# Supplementary material for: Expansion within the CYP71D subfamily drives the heterocyclization of tanshinones synthesis in Salvia miltiorrhiza
Source: PubMed Central journal article supplement (PMC7846762; doi:10.1038/s41467-021-20959-1), 2021-01-29
Supplement: 41467_2021_20959_MOESM4_ESM.pdf [file 41467_2021_20959_MOESM4_ESM.pdf]

## Description of Additional Supplementary Files

### Supplementary Data 1

Expanded gene family in Danshen.

### Supplementary Data 2

Contracted gene family in Danshen.

### Supplementary Data 3

Downregulated diterpenoids indicated by targeted metabolomics analysis of WT and CYP71Ds-RNAi lines by LC-qTOF-MS. Source data are provided as a Source Data file.

### Supplementary Data 4

Upregulated diterpenoids indicated by targeted metabolomics analysis of WT and CYP71Ds-RNAi lines by LC-qTOF-MS. Source data are provided as a Source Data file.
